# Supplementary material for: Bladder Tissue Microbiome Composition in Patients of Bladder Cancer or Benign Prostatic Hyperplasia and Related Human Beta Defensin Levels
Source: MDPI journal article supplement (doi:10.3390/biomedicines10071758), 2022-07-21
Supplement: s1 [file s1]

## Bladder tissue microbiome composition in patients of bladder cancer or benign prostatic hyperplasia and related human beta defensin levels

Mansour Bassel<sup>1</sup>, Ádám Monyók<sup>1</sup>, Márió Gajdács<sup>2</sup>, Balázs Stercz<sup>3</sup>, Nóra Makra<sup>3</sup>, Kinga Péntes<sup>3</sup>, István Vadnay<sup>4</sup>, Dóra Szabó<sup>3</sup>, Eszter Ostorházi<sup>3,5,\*</sup>

Table S1. The characteristics of the study participants.

|                                            | <b>Bladder Cancer Group</b> | <b>Prostatic Hypertrophy</b> | <b>Healthy Volunteers</b> |
|--------------------------------------------|-----------------------------|------------------------------|---------------------------|
| <b>Number of participants</b>              | 55 (46 in defensin tests)   | 12                           | 34                        |
| <b>Median age of participants</b>          | 68.5 ( IQR: 14)             | 71.5 (IQR:19)                | 51 (IQR:42)               |
| <b>Male/Female</b>                         | 32/14                       | 12                           | 17/17                     |
| <b>Diabetes mellitus/ No DM</b>            | 36/10                       | 8/4                          | 1/33                      |
| <b>Hypertension/ Normal blood pressure</b> | 29/17                       | 9/3                          | 4/30                      |
| <b>Smoker/No smoker</b>                    | 28/18                       | 7/5                          | 12/24                     |
| <b>Stage:</b>                              | Ta:2, T1:27, T2:17,         | NA                           | NA                        |
| <b>Grade:</b>                              | G1:23 ,G2:9, G3:14          | NA                           | NA                        |
